# Supplementary material for: The Role of the Second Extracellular Loop of Norepinephrine Transporter, Neurotrophin-3 and Tropomyosin Receptor Kinase C in T Cells: A Peripheral Biomarker in the Etiology of Schizophrenia
Source: MDPI journal article supplement (doi:10.3390/ijms22168499), 2021-08-07

## Supplementary material

**Supplementary Table 1:** Main antipsychotic treatment.

| Current treatment                          | Number of patients (N) | % of patients | Dose (mg)*      |
|--------------------------------------------|------------------------|---------------|-----------------|
| <b>First-episode psychosis (FEP)</b>       |                        |               |                 |
| Drug naïve                                 | 12                     | 22.22         | -               |
| <b>Chronic phase</b>                       |                        |               |                 |
| Aripiprazole                               | 8                      | 14.82         | 19.43 ± 8.42    |
| Aripiprazole + Olanzapine                  | 1                      | 3.70          | 20 + 20         |
| Aripiprazole + Olanzapine + Zuclopenthixol | 1                      | 1.85          | 15 + 20 + 200   |
| Aripiprazole + Clozapine                   | 1                      | 1.85          | 415 + 25        |
| Aripiprazole + Quetiapine                  | 1                      | 1.85          | 10 + 50         |
| Paliperidone                               | 2                      | 1.85          | 206.05 ± 56.50  |
| Olanzapine                                 | 8                      | 14.81         | 13.75 ± 4.15    |
| Olanzapine + Risperidone                   | 1                      | 1.85          | 15 + 2          |
| Risperidone                                | 7                      | 12.96         | 5.38 ± 2.06     |
| Risperidone + Olanzapine + Aripiprazole    | 1                      | 1.85          | 20 + 6 + 400    |
| Ziprasidone + Zuclopenthixol               | 1                      | 1.85          | 40 + 200        |
| Clomethiazole                              | 1                      | 1.85          | 192             |
| Clozapine                                  | 9                      | 16.68         | 322.22 ± 103.04 |

Antipsychotic treatment of patients diagnosed with schizophrenia. \* Dose or mean ± SD of dose.

**Supplementary Table 2:** Correlation between NT-3, TrkC and NET<sub>ext</sub> levels and clinical variables.

| PARAMETERS          | NT-3    |        | NET <sub>ext</sub> |        | TrkC    |        |
|---------------------|---------|--------|--------------------|--------|---------|--------|
|                     | r       | p      | r                  | p      | r       | p      |
| PANSS Positive      | -0.1384 | 0.4502 | 0.1566             | 0.3840 | -0.2959 | 0.1603 |
| PANSS Negative      | -0.0023 | 0.9901 | 0.1113             | 0.5312 | 0.1250  | 0.5606 |
| PANSS General       | -0.1348 | 0.4620 | 0.1283             | 0.4769 | -0.2822 | 0.1815 |
| PANSS Total         | -0.1229 | 0.5029 | 0.1756             | 0.3282 | -0.1771 | 0.4077 |
| Illness onset       | -0.2861 | 0.1124 | -0.0728            | 0.6873 | -0.1154 | 0.5912 |
| Duration of illness | -0.0705 | 0.7013 | 0.0418             | 0.8172 | 0.0514  | 0.8114 |
| NLR                 | 0.1382  | 0.4507 | -0.1177            | 0.5147 | 0.0303  | 0.8882 |

Statistically significant according to Pearson's correlation coefficients:  $P \leq 0.05^*$  (two-tailed). PANSS:

Positive and Negative Syndrome Scale. NLR: neutrophil-lymphocyte ratio.

**Supplementary Figure 1:** CABS-dock workflow.

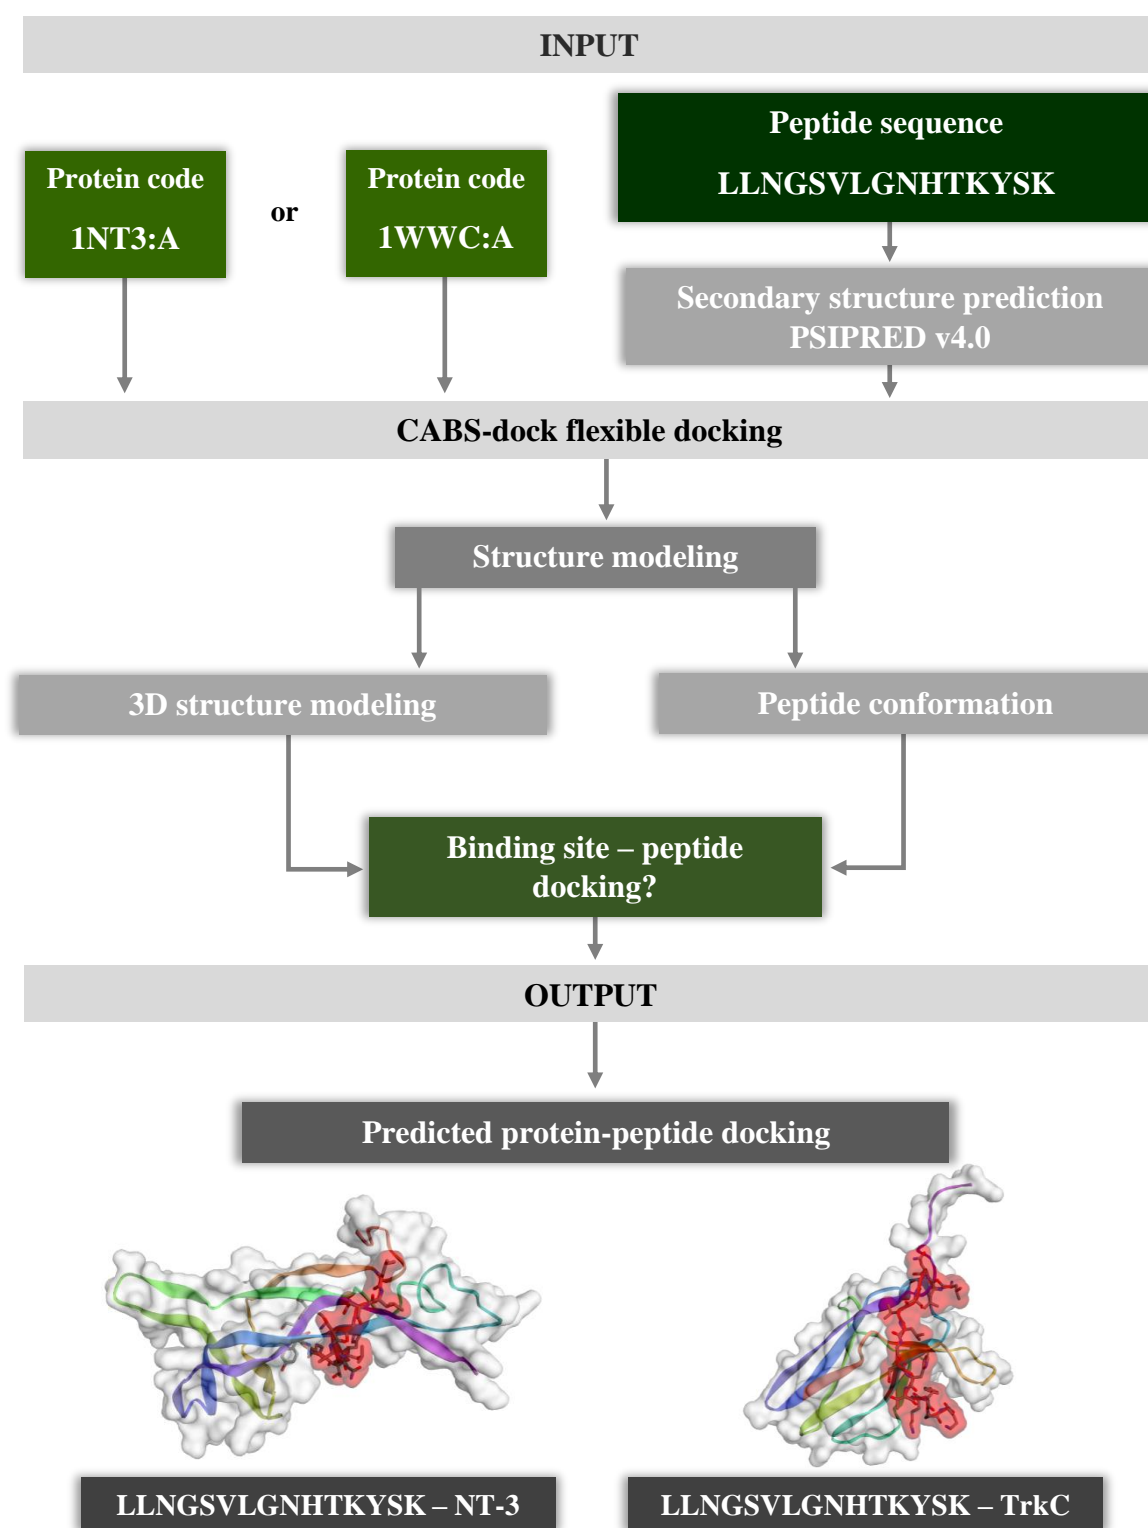

**Legend:** CABS-dock web server workflow used to predict binding models of protein-peptide

**Supplementary Figure 2:** Fluorescence microscopy images of blood lymphocytes.

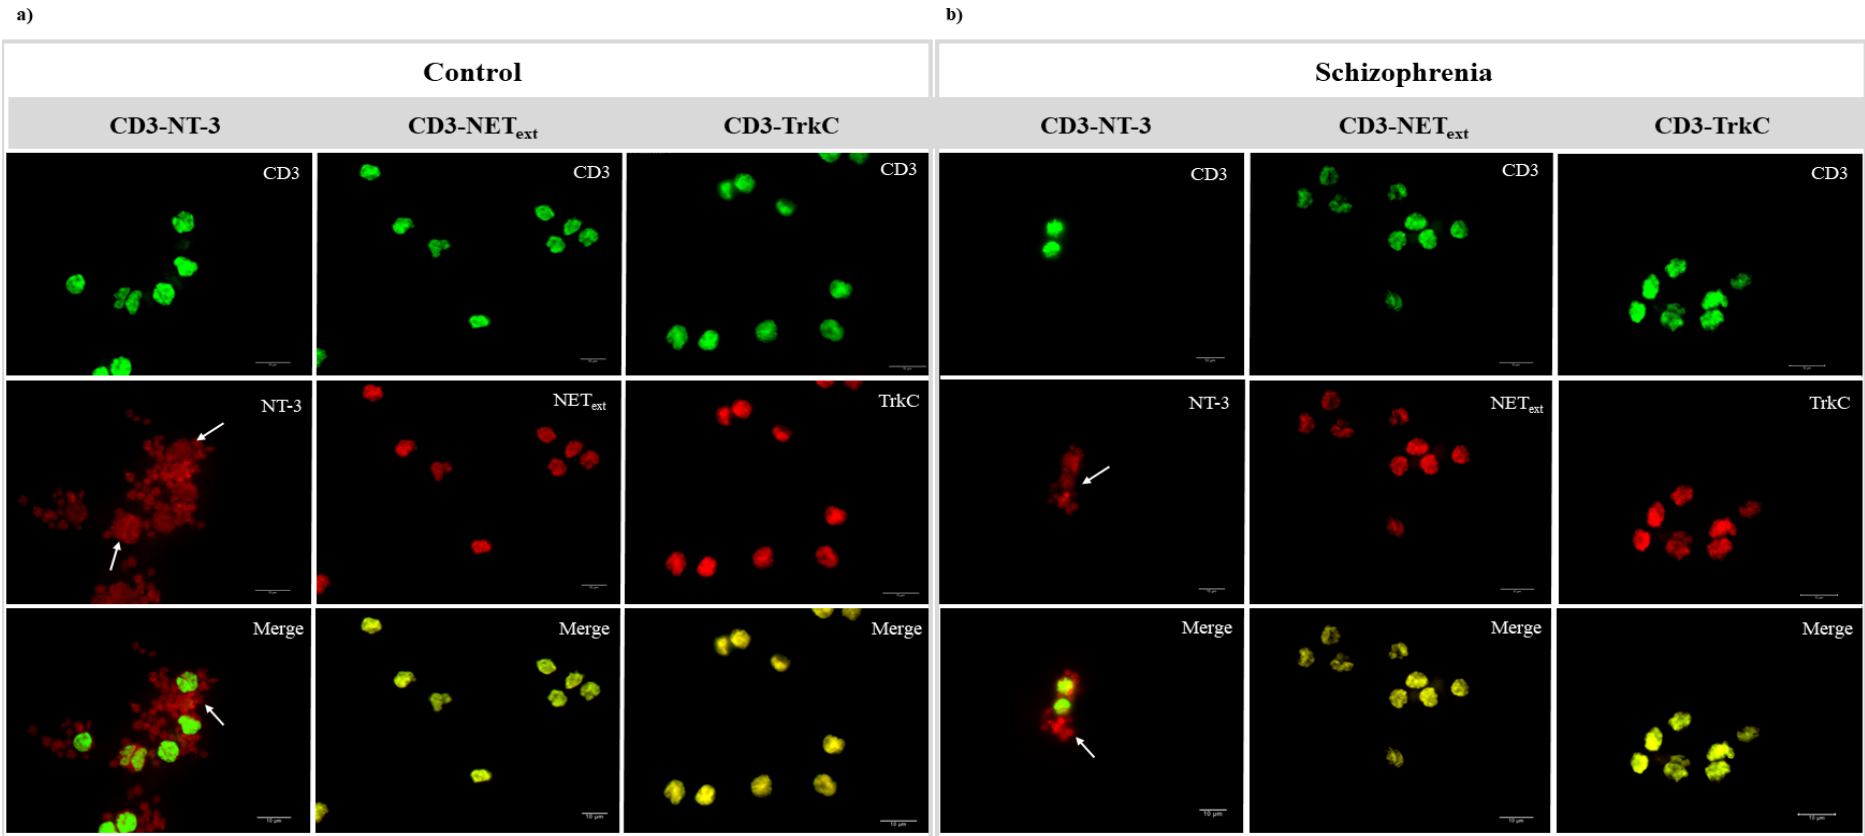

**Legend:** Lymphocytes stained with anti-CD3 + anti-Alexa Fluor 488 (green color) and anti-NT-3 + anti-Alexa Fluor 594 (red color) antibodies expanded from peripheral blood mononuclear cells with an HCX PL APO CS 63.0x1.40 OIL UV objective. a) Immunostaining of lymphocytes of a control that showed the expression of CD3 (green), NT-3, NET<sub>ext</sub> and TrkC (red). b) Immunostaining of lymphocytes of a patient with schizophrenia that showed the expression of CD3 (green), NT-3, NET<sub>ext</sub> and TrkC (red). The white arrows indicate the differential expression of NT-3 in the control compared to the patients with schizophrenia.

**Supplementary figure 3:** Top ten of predictive protein-peptide docking for NT-3.

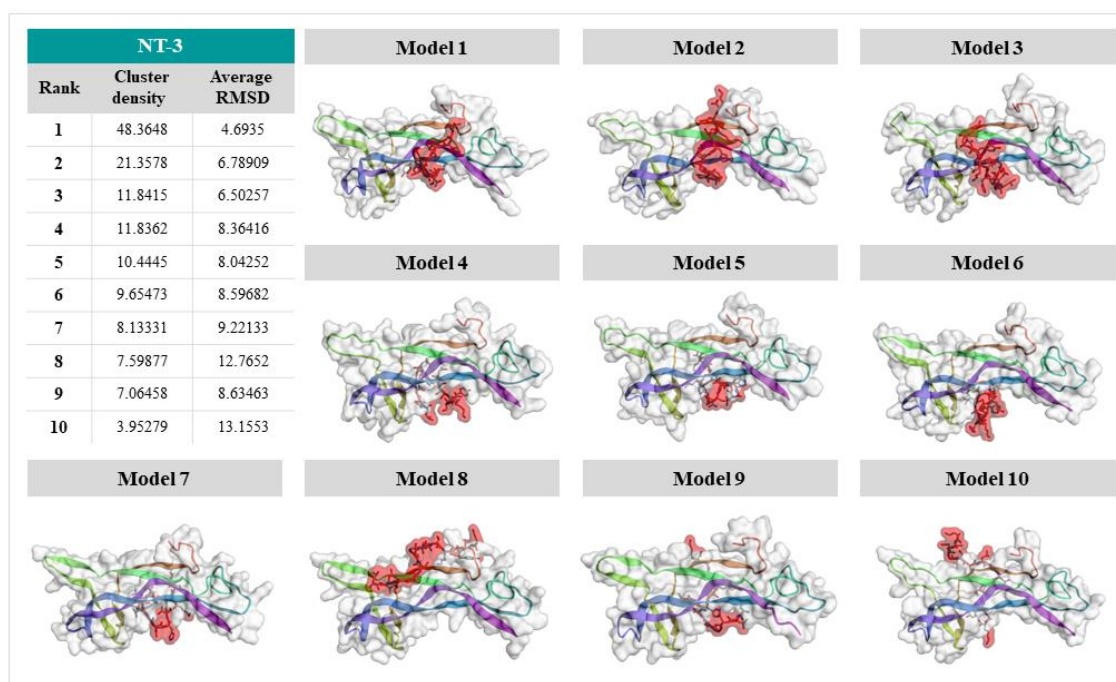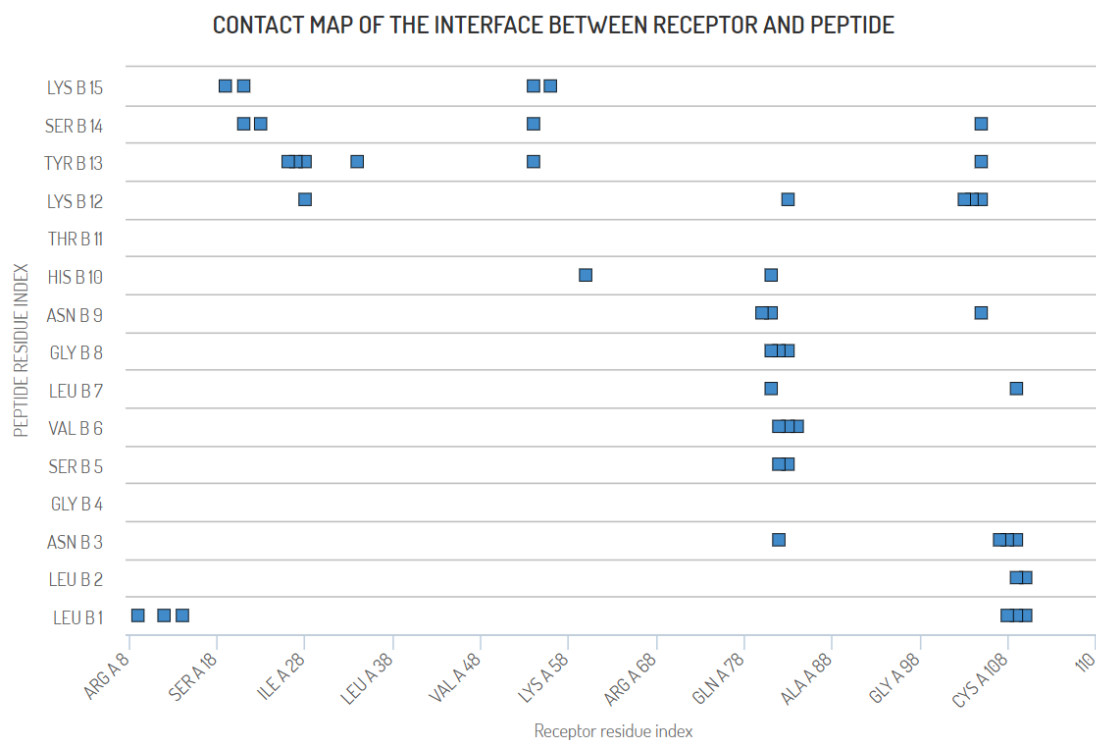

**Legend:** Computational modelling of protein-peptide docking of NT-3 (1nt3:A) and the peptide (NEText: LLNGSVLGNHTKYSK). Clustering details of the ten models are shown in the respective tables (cluster density is the number of elements in cluster (N)/Average of RMSD). The contact map shows the pairs of peptide/NT-3 residues closer than 4.5 Å in the complex.

**Supplementary figure 4:** Top ten of predictive protein-peptide docking for TrkC.

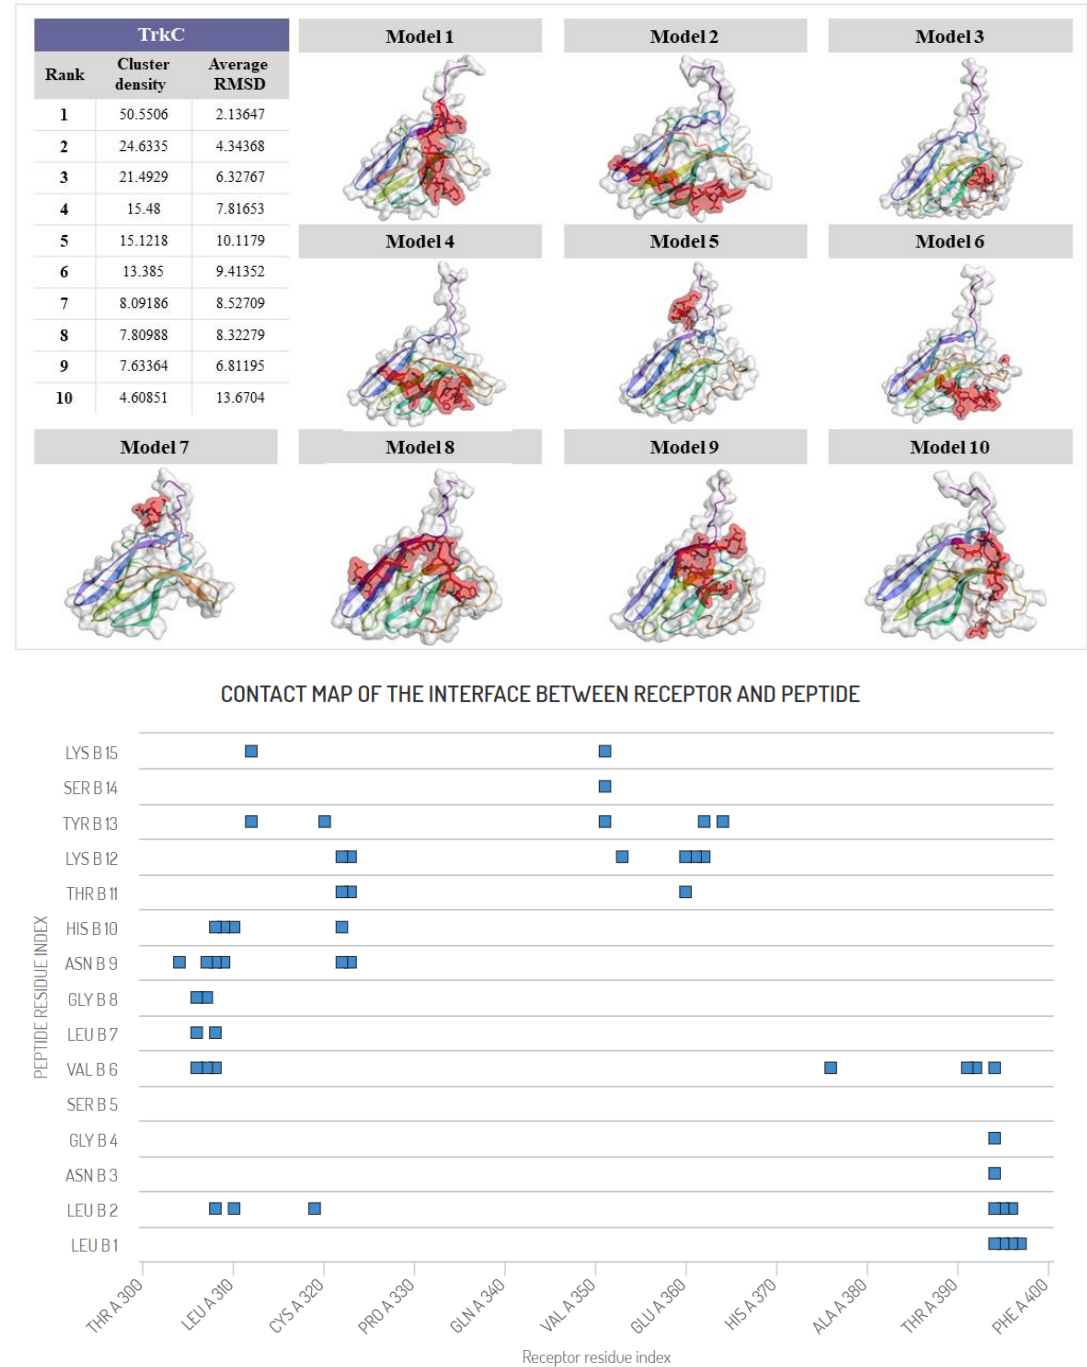

**Legend:** Computational modelling of protein-peptide docking of TrkC (1wwc:A) and the peptide (NEText: LLNGSVLGNHTKYSK). Clustering details of the ten models are shown in the respective tables (cluster density is the number of elements in cluster (N)/Average of RMSD). The contact map shows the pairs of peptide/TrkC residues closer than 4.5 Å in the complex.

Original immunofluorescence images.

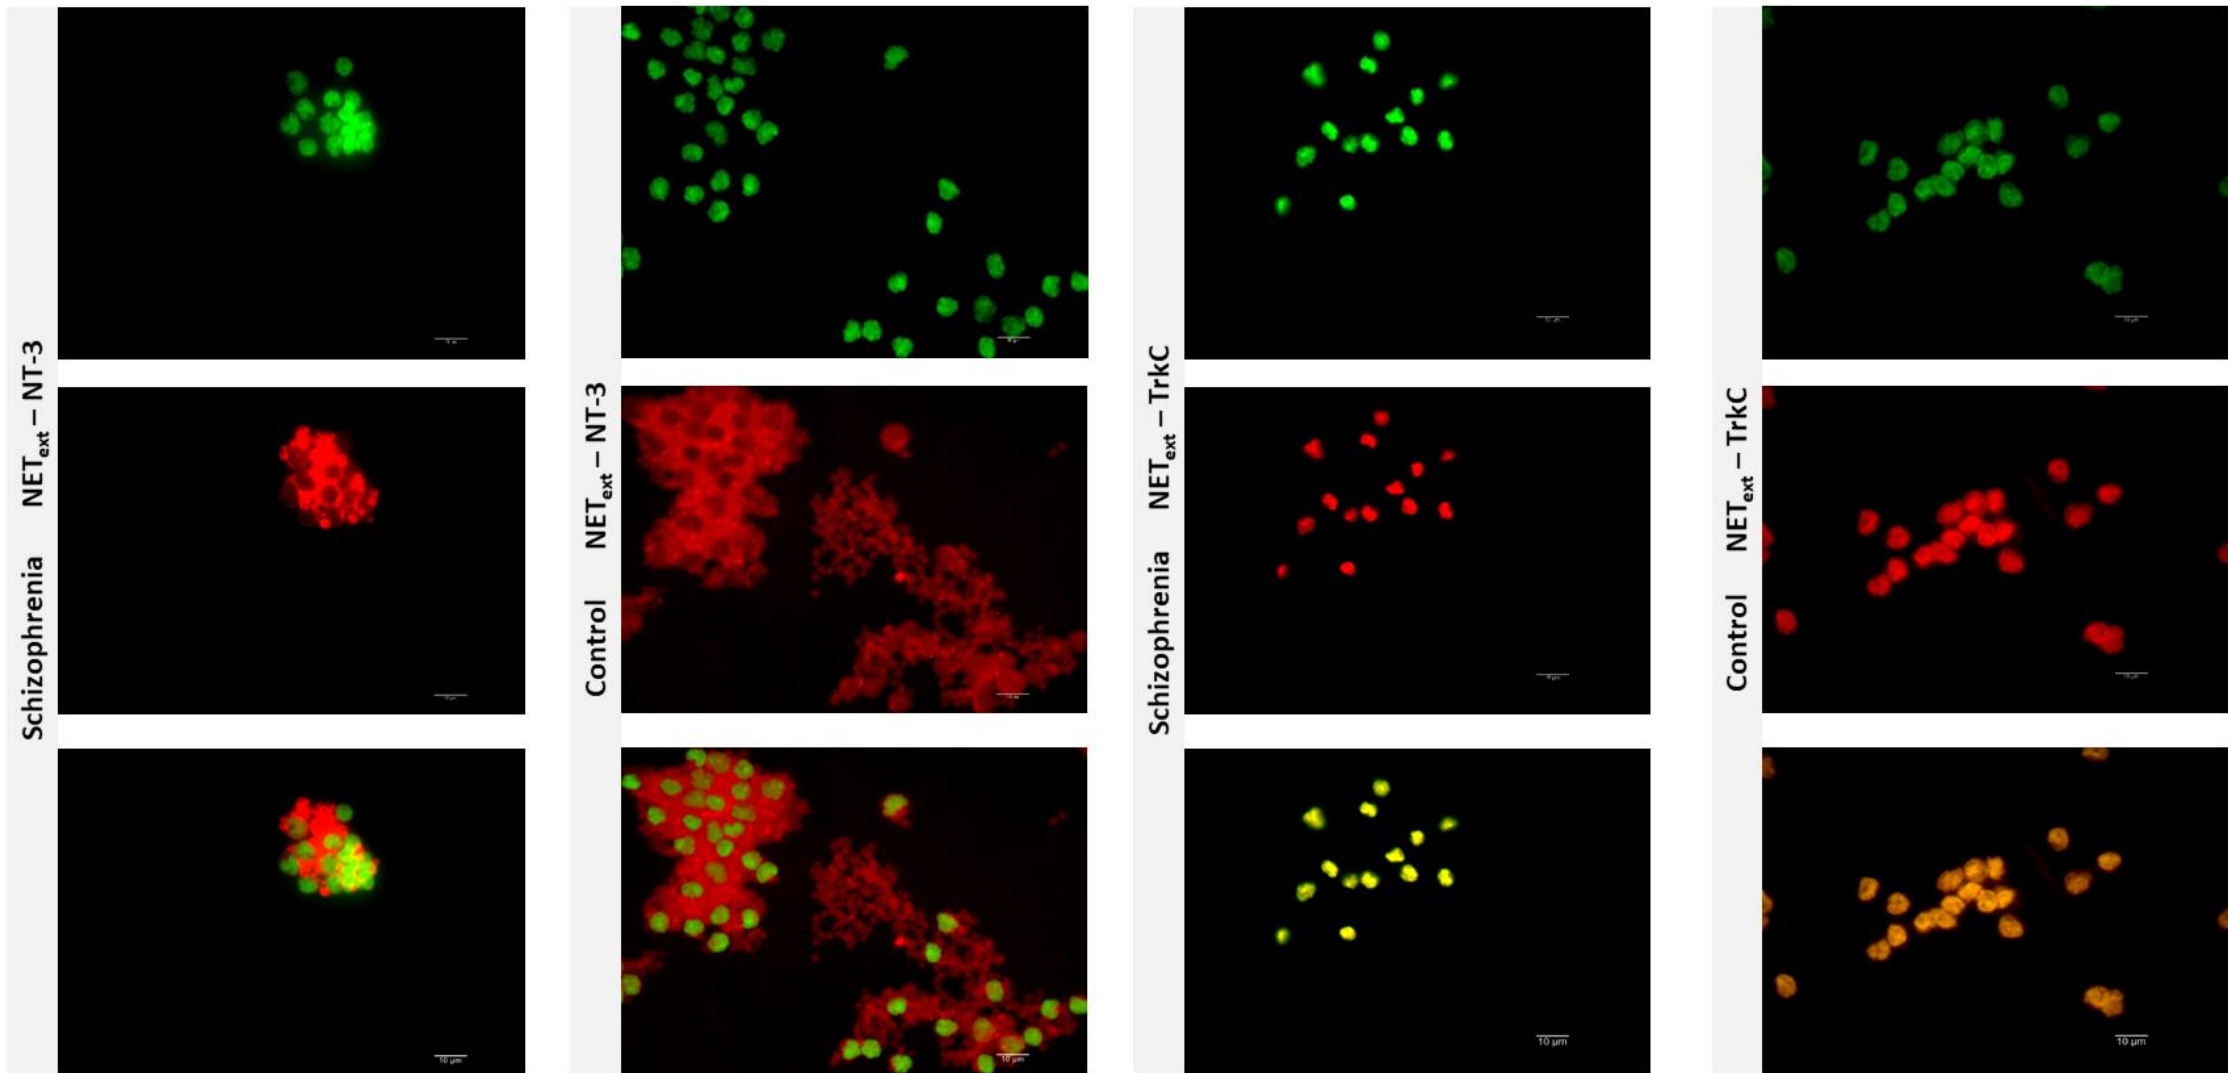



## Original Western blots:

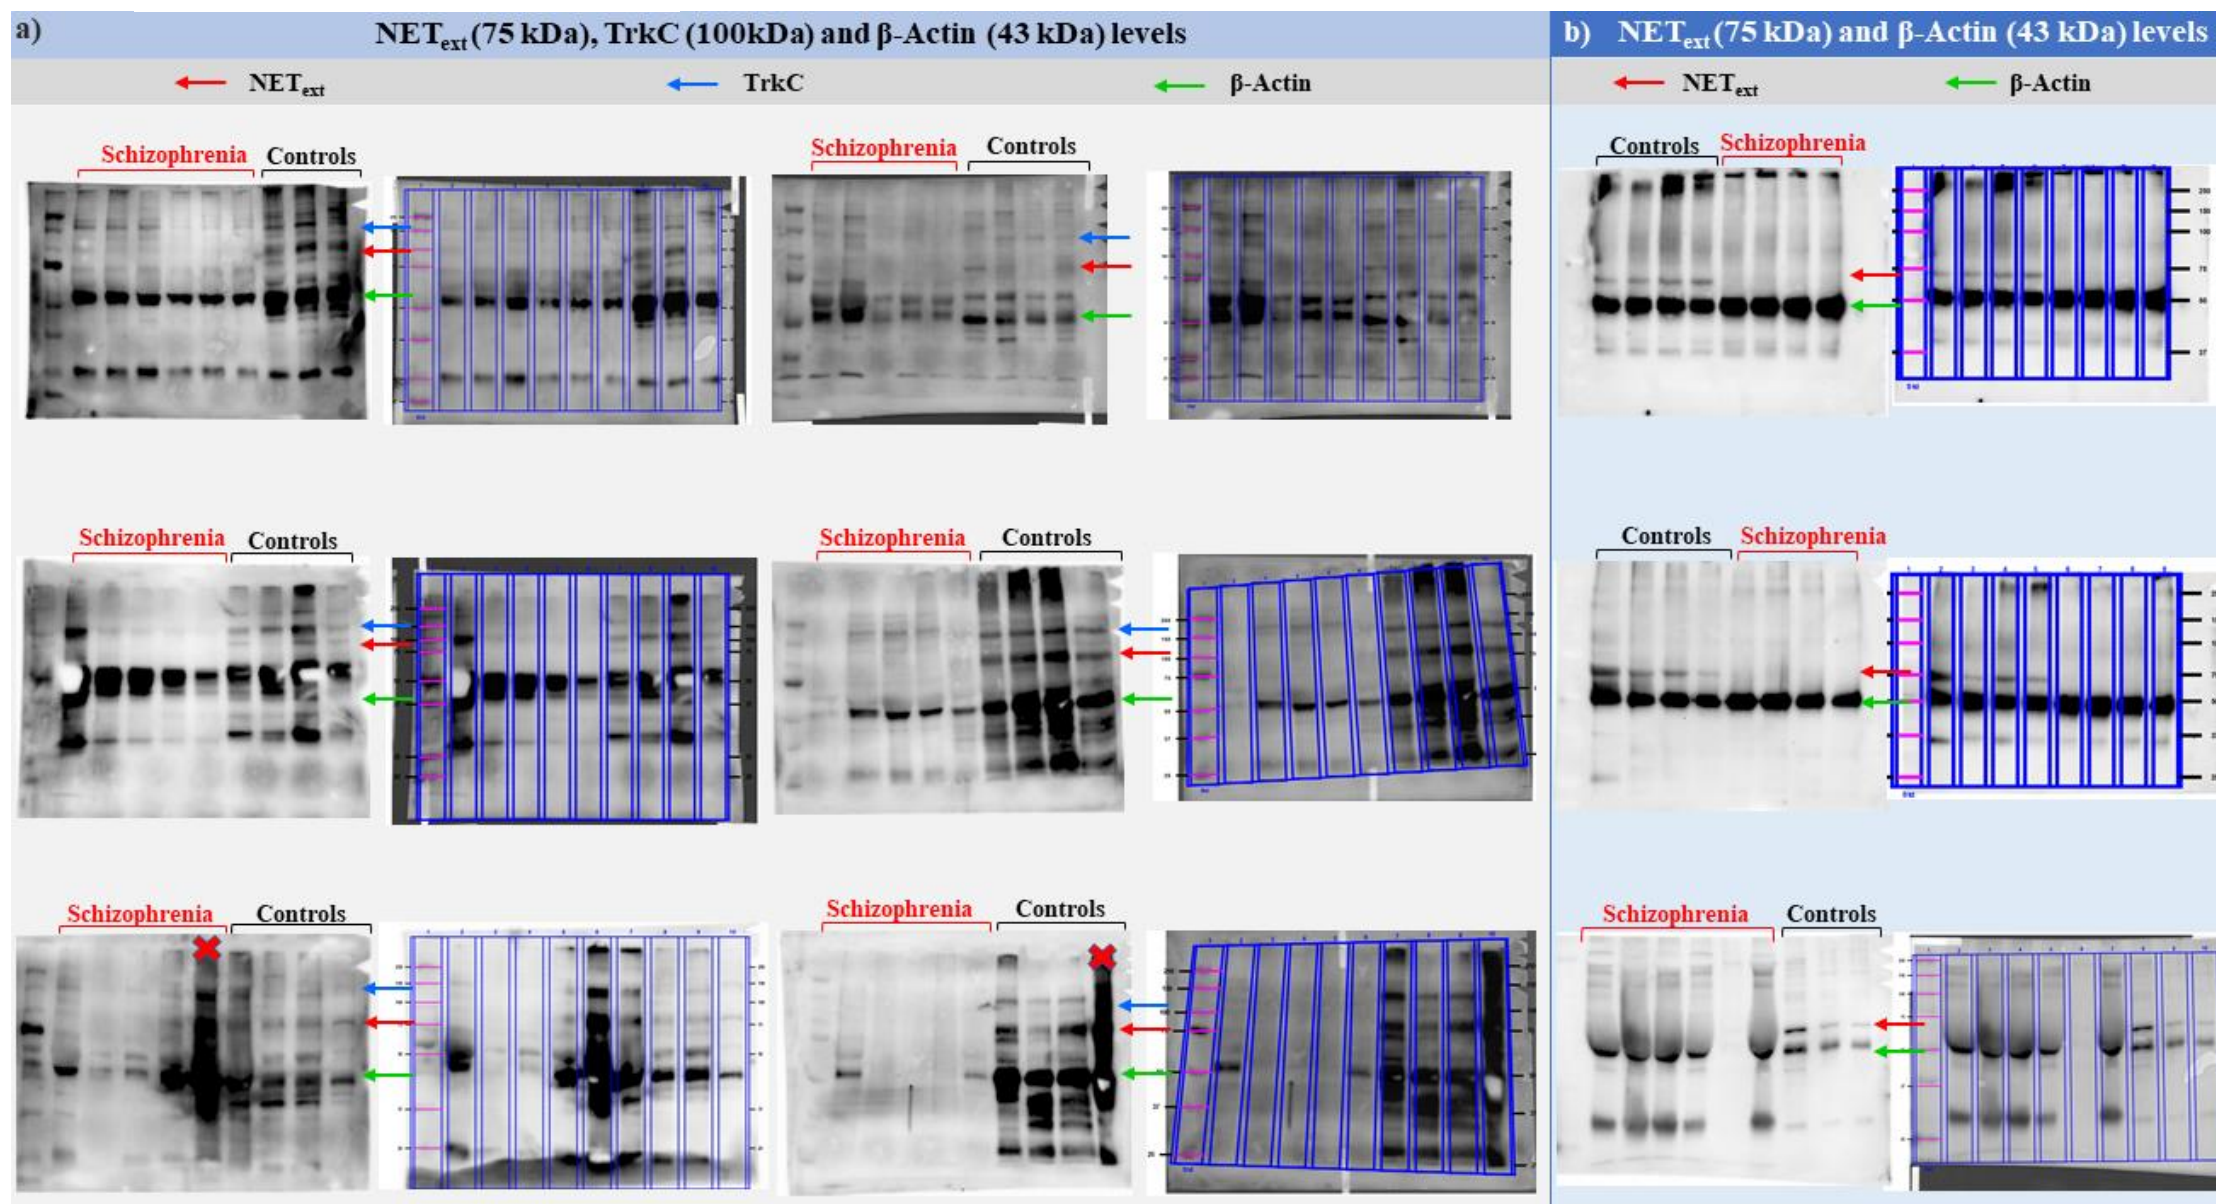

a) Simultaneous detection of NET<sub>ext</sub>, TrkC and  $\beta$ -Actin using T cell samples. b) Original blots of NET<sub>ext</sub> and  $\beta$ -Actin using T cell samples. Blue arrows correspond to TrkC ( $\approx$ 100 kDa), red arrows correspond to NET<sub>ext</sub> (75 kDa and green arrows correspond to  $\beta$ -Actin (43 kDa).



Original Co-IPs:

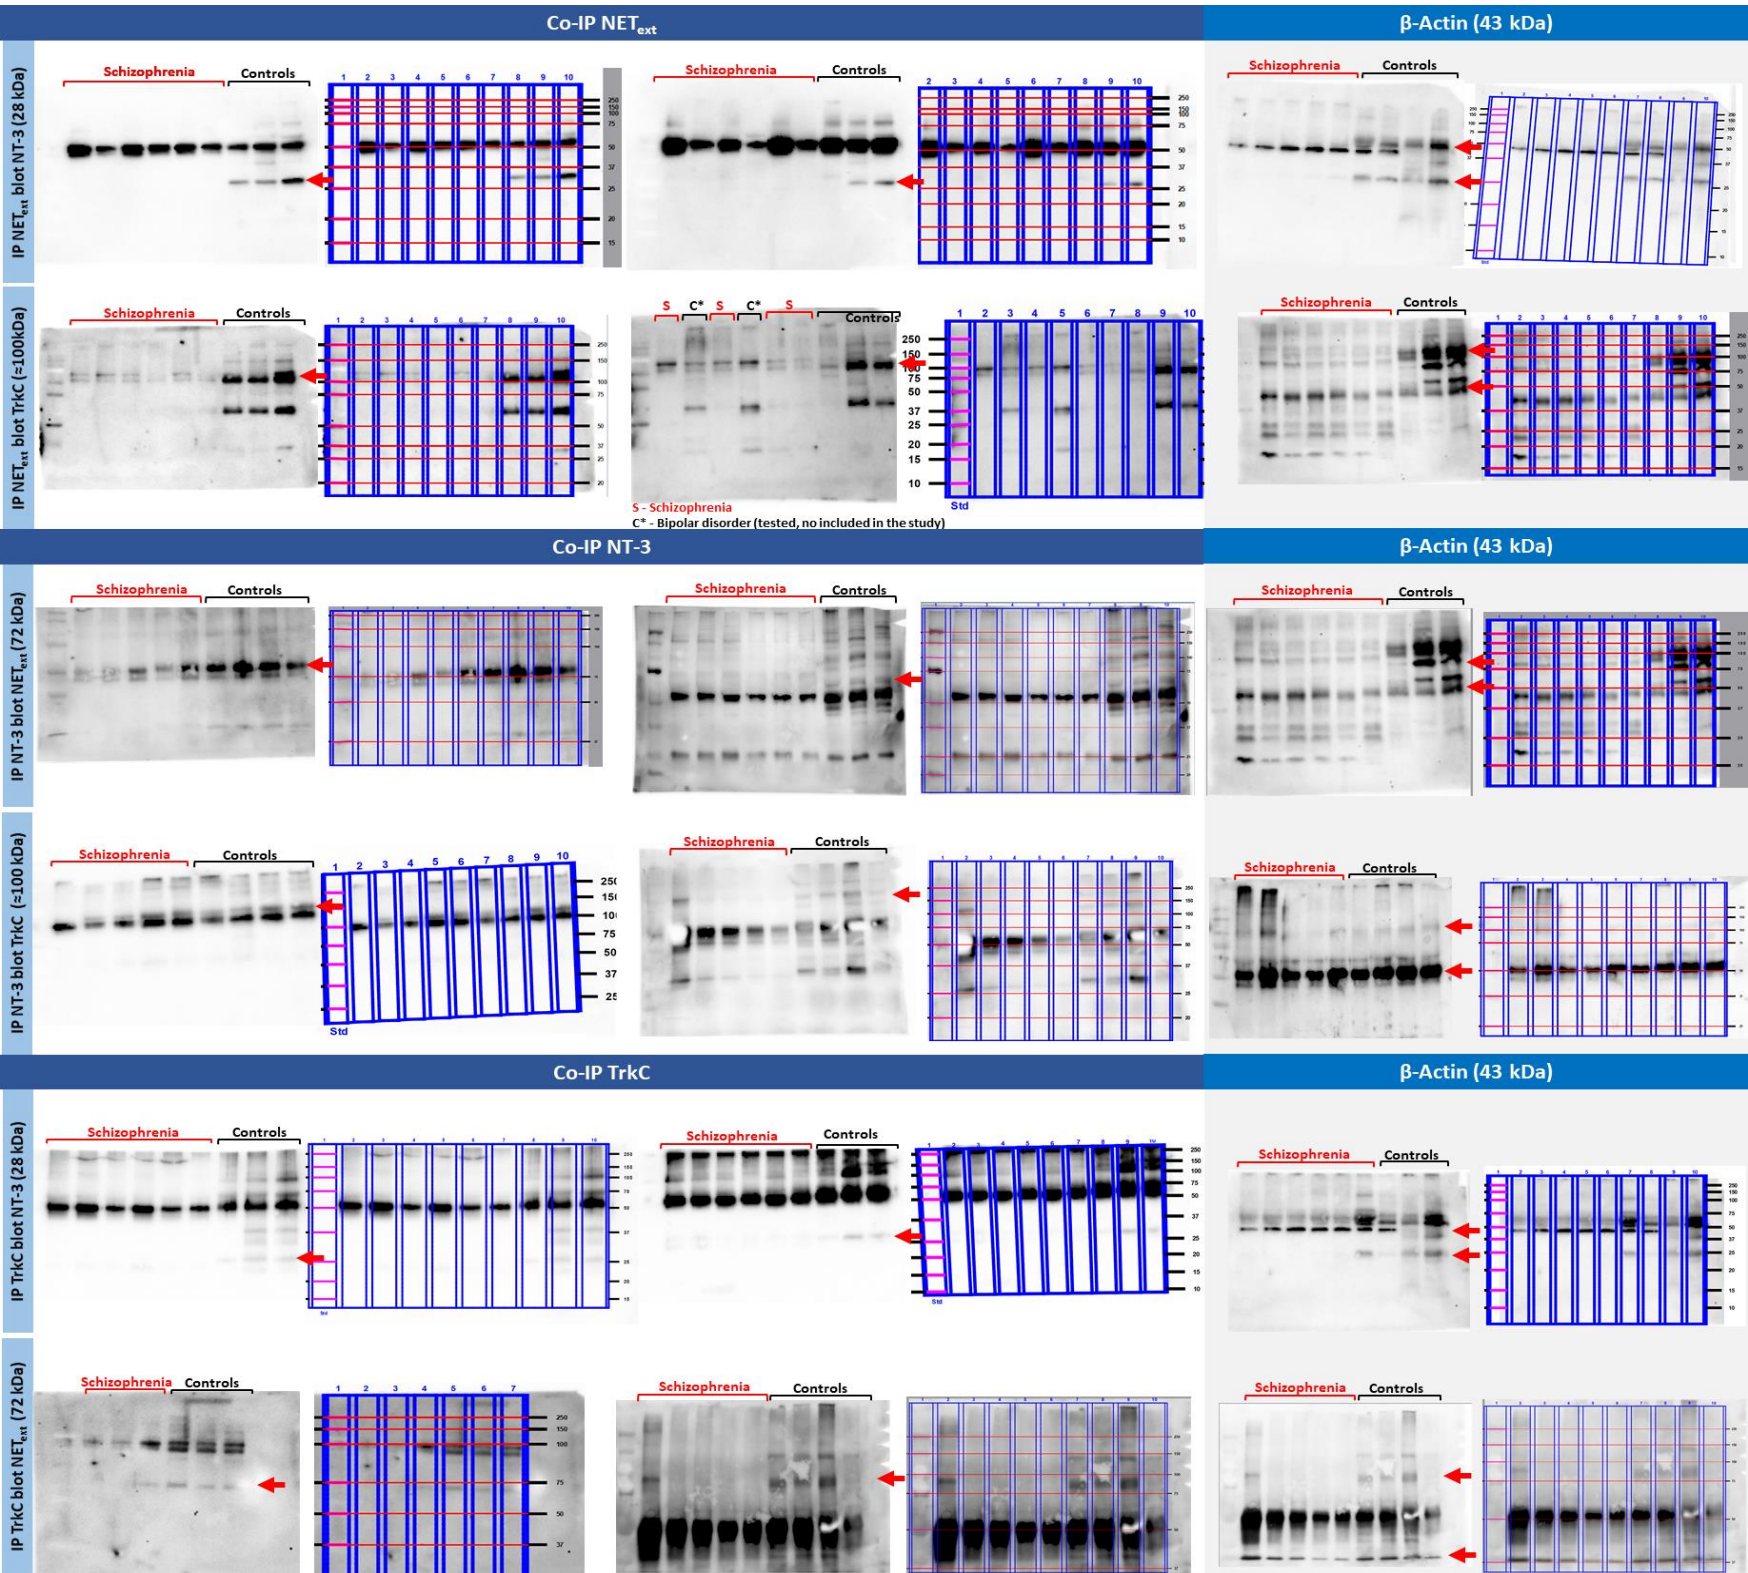

Supplement: s1 [file s1]
